# Supplementary material for: River hydraulic modelling with ICEsat-2 land and water surface elevation
Source: Copernicus journal article supplement (doi:10.5194/egusphere-2022-377), 2022-06-14
Supplement: Supplementary file 1 [file ATL13_filter_wse.xls]

## Sheet: sheet1
Date	Q Jimai	Q Mentanng	Chainage	ATL13 wse
2019-03-13			490970	3954.23
2019-12-01			517140	3929.91
2019-01-11			524775	3922.7
2019-12-30			526850	3920.54
2019-10-01			527155	3921.35
2019-01-11			531825	3916.63
2019-01-11			535075	3913.57
2020-06-29			535625	3913.8
2019-12-30			535793	3913.13
2019-01-11			539768	3908.9
2019-04-11			539980	3909.08
2019-12-30			540927	3908.66
2019-01-01			553370	3897.19
2019-08-09			553620	3898.27
2020-03-30			554545	3896.98
2019-07-11			554790	3897.74
2020-03-30			555720	3895.8
2019-01-01			556750	3894.08
2020-03-30			562390	3889.82
2019-08-09			566550	3887.49
2020-03-30			568580	3884.84
2019-08-09			573915	3882.17
2020-01-28			578420	3878.78
2020-01-28			578660	3878.51
2020-01-28			579340	3878.19
2019-05-10			589850	3866.75
2019-05-10			592852	3864.24
2018-10-31			600860	3857.27
2018-10-31			610780	3847.94
2019-12-07			614691	3844.15
2019-12-07			615000	3843.92
2019-12-07			622460	3836.1
2018-10-31			629660	3829.5
2019-12-07			630343	3828.05
2018-10-31			635858	3823.49
2018-10-31			636065	3823.34
2018-10-31			637680	3821.59
2019-12-07			645310	3813.92
2019-10-29			647680	3812.48
2019-10-29			647980	3812.09
2019-03-10			652855	3806.92
2019-03-10			652990	3806.76
2019-08-29			653200	3808.46
2019-10-29			653215	3807.88
2019-03-10			660270	3798
2019-08-29			661140	3799.25
2019-03-10			665218	3791.71
2020-08-26			666030	3792.87
2020-08-26			672270	3776.13
2020-08-26			677230	3766.99
2019-02-28			682760	3758.78
2019-10-06			685875	3753
2019-11-28			694910	3738.94
2020-05-27			695510	3738.79
2019-01-07			698660	3733.94
2019-11-28			701815	3729.57
2019-01-07			704164	3727.12
2019-11-28			707940	3722.27
2019-01-07			708840	3721.28
2019-03-29			715050	3714.96
2019-09-26			715080	3714.96
2019-08-05			716332	3715.18
2018-12-28			716367	3714.04
2019-12-26			719990	3709.7
2019-08-05			721855	3708.89
2018-12-28			728250	3700.33
2020-05-04			729575	3700.58
2019-08-05			730230	3699.92
2019-08-05			735130	3694.75
2019-08-05			736054	3693.6
2020-02-03			772445	3657.58
2020-02-03			772507	3657.61
2020-08-02			772850	3657.45
2020-08-02			773230	3657.24
2020-02-03			778950	3651.18
2020-02-03			780510	3649.68
2020-02-03			784083	3645.33
2019-09-03			790870	3638.42
2019-09-03			791030	3638.22
2020-02-03			791390	3637.72
