# Supplementary material for: River hydraulic modelling with ICEsat-2 land and water surface elevation
Source: Copernicus journal article supplement (doi:10.5194/egusphere-2022-377), 2022-06-14
Supplement: Supplementary file 2 [file Sim_Q_SS_solver.xls]

## Sheet: Sheet1
	Date	Q_Jimai	Q_Mentang	chain	mean_wse	Q_DS	UPA	sim_Q	sim_Q_mentang	sim_Q_Jimai
0	2021-01-06			560095	3891.74	86.5993	48419.8	90.0907	110.64	83.6976
1	2021-01-22			770235	3658.31	89.2639	57620.5	95.4257	98.4903	74.5065
2	2021-01-31			770408	3657.8	89.2639	57967.7	104.146	106.813	80.8028
3	2021-03-29			562080	3890.06	117.242	48435	140.365	172.347	130.378
4	2021-04-26			614717	3844.14	142.556	49259.2	168.981	204.013	154.333
5	2021-05-29			517520	3929.55	279.414	48004.5	273.783	339.179	256.585
6	2021-06-04			632465	3827.21	259.125	50951	268.318	313.794	237.381
7	2021-07-07			537072	3912.45	555.276	48221.4	491.069	605.444	458.01
8	2021-08-01			765737	3662.86	275.22	57796.3	233.116	239.506	181.183
9	2021-10-02			716705	3714.74	797.044	53518.4	551.506	612.831	463.598
10	2021-10-06			564280	3889.73	743.79	48453.2	559.238	686.386	519.242
11	2018-10-31			625502	3833.59	394.024	50312.5	330.158	391.923	296.485
12	2018-12-28			716367	3714.04	201.522	53521	198.855	220.962	167.155
13	2019-01-07			701412	3730.53	171.843	53391.8	157.8	175.741	132.946
14	2019-01-11			530558	3917.63	171.843	48132	150.176	185.551	140.367
15	2019-03-10			652922	3806.84	146.928	52155	168.568	192.213	145.407
16	2019-03-13			490970	3954.23	151.691	44989.5	153.341	202.699	153.339
17	2019-04-11			539980	3909.08	208.85	48271.8	148.858	183.393	138.734
18	2019-05-10			592852	3864.24	353.281	48910	209.089	254.237	192.327
19	2019-08-05			727539	3702.9	678.486	55911.7	774.341	821.909	621.763
20	2019-08-29			657170	3803.85	711.532	52247	818.069	931.318	704.53
21	2019-10-01			527155	3921.35	800.237	48123	491.968	607.98	459.929
22	2019-10-06			685875	3753	705.951	52707	460.808	519.945	393.331
23	2019-10-29			647830	3812.28	442.153	52092.8	528.897	603.808	456.773
24	2019-12-01			517140	3929.91	258.314	48002	286.614	355.093	268.623
25	2019-12-07			625561	3833.23	245.49	50369.4	167.26	197.767	149.608
26	2019-12-26			719990	3709.7	190.53	53526	184.982	205.527	155.479
27	2019-12-30			531321	3916.83	183.201	48142	129.524	159.99	121.03
28	2020-02-03			783617	3646.19	178.621	58962.6	119.007	120.063	90.8261
29	2020-03-30			560309	3891.86	223.506	48428.9	140.348	172.346	130.378
30	2020-05-27			695510	3738.79	301.188	52768.7	297.379	335.15	253.537
31	2020-06-29			535625	3913.8	621.447	48162	385.537	476.065	360.137
32	2020-08-02			773040	3657.35	836.028	58665.5	734.575	744.659	563.325
33	2020-08-26			671630	3779.93	819.655	52464.8	611.209	692.939	524.199
