# Supplementary material for: River hydraulic modelling with ICEsat-2 land and water surface elevation
Source: Copernicus journal article supplement (doi:10.5194/egusphere-2022-377), 2022-06-14
Supplement: Supplementary file 3 [file WSE_sim_SS_solver.xls]

## Sheet: Sheet1
	sim_wse_chain717320	sim_wse_chain677473	sim_wse_chain616490	sim_wse_chain565990	sim_wse_chain548060	sim_wse_chain491020	Date
0	3713.4	3766.23	3842.76	3887.8	3902.13	3954.65	2018-10-31
1	3712.97	3765.72	3842.29	3887.28	3901.77	3954.2	2018-12-28
2	3712.8	3765.54	3842.14	3887.11	3901.61	3954.04	2019-01-07
3	3712.89	3765.62	3842.18	3887.15	3901.65	3954.08	2019-01-11
4	3712.87	3765.61	3842.19	3887.17	3901.67	3954.1	2019-03-10
5	3712.96	3765.7	3842.26	3887.24	3901.73	3954.14	2019-03-13
6	3712.89	3765.62	3842.17	3887.14	3901.64	3954.07	2019-04-11
7	3713.08	3765.84	3842.4	3887.39	3901.89	3954.3	2019-05-10
8	3714.14	3767.14	3843.62	3888.74	3902.64	3955.44	2019-08-05
9	3714.25	3767.31	3843.81	3888.95	3902.73	3955.63	2019-08-29
10	3713.77	3766.72	3843.21	3888.31	3902.44	3955.07	2019-10-01
11	3713.67	3766.57	3843.05	3888.12	3902.31	3954.92	2019-10-06
12	3713.8	3766.76	3843.22	3888.31	3902.43	3955.06	2019-10-29
13	3713.33	3766.14	3842.67	3887.7	3902.09	3954.57	2019-12-01
14	3712.9	3765.64	3842.21	3887.19	3901.69	3954.12	2019-12-07
15	3712.91	3765.66	3842.24	3887.22	3901.72	3954.15	2019-12-26
16	3712.84	3765.56	3842.1	3887.05	3901.56	3953.98	2019-12-30
17	3712.57	3765.3	3841.92	3886.84	3901.4	3953.82	2020-02-03
18	3712.85	3765.58	3842.13	3887.09	3901.6	3954.03	2020-03-30
19	3713.28	3766.09	3842.62	3887.65	3902.06	3954.52	2020-05-27
20	3713.56	3766.43	3842.95	3888.02	3902.25	3954.84	2020-06-29
21	3714.04	3767.01	3843.48	3888.59	3902.58	3955.31	2020-08-02
22	3713.95	3766.93	3843.39	3888.49	3902.53	3955.22	2020-08-26
23	3712.53	3765.25	3841.88	3886.79	3901.34	3953.77	2021-01-06
24	3712.48	3765.19	3841.83	3886.73	3901.26	3953.72	2021-01-22
25	3712.52	3765.23	3841.86	3886.77	3901.31	3953.76	2021-01-31
26	3712.78	3765.52	3842.12	3887.09	3901.6	3954.03	2021-03-29
27	3712.88	3765.63	3842.24	3887.22	3901.71	3954.14	2021-04-26
28	3713.24	3766.04	3842.62	3887.66	3902.06	3954.53	2021-05-29
29	3713.21	3766.01	3842.56	3887.58	3902.03	3954.46	2021-06-04
30	3713.76	3766.7	3843.21	3888.31	3902.43	3955.07	2021-07-07
31	3713.03	3765.78	3842.35	3887.35	3901.84	3954.26	2021-08-01
32	3713.83	3766.78	3843.24	3888.33	3902.44	3955.08	2021-10-02
33	3713.9	3766.87	3843.37	3888.48	3902.53	3955.21	2021-10-06
